# Supplementary material
Source: PubMed Central journal article supplement (PMC3346129)

Supplemental Figure 1

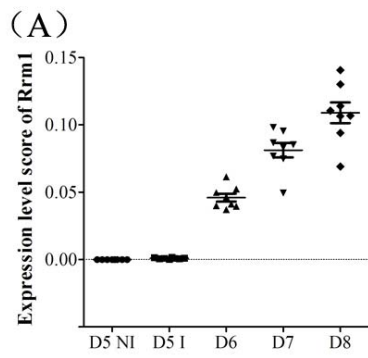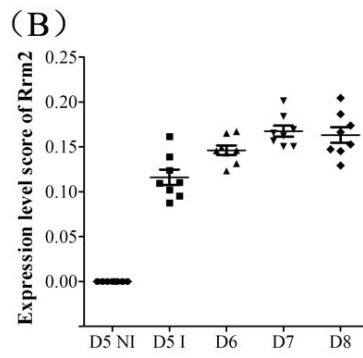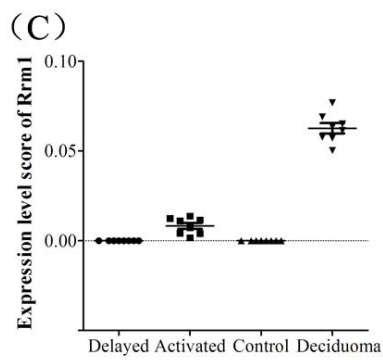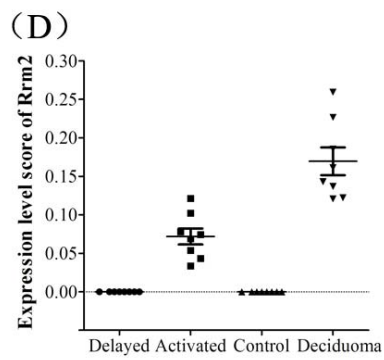

Supplement: supp_M111.308023_jbc.M111.308023-1.pdf [file supp_M111.308023_jbc.M111.308023-1.pdf]
